# Supplementary material for: Caffeine consumption of medical students in Korea: amount and symptoms based on a 2023 survey
Source: PubMed Central journal article supplement — Korean J Med Educ. 2024 Aug 29;36(3):267–74. doi: 10.3946/kjme.2024.301 (PMC11456684; doi:10.3946/kjme.2024.301), 2024-08-29
Supplement: kjme-2024-301-Supplement-1.pdf [file kjme-2024-301-Supplement-1.pdf]

**Supplement 1. Survey Forms Used in This Study**

## 영남대 의대 학우들의 카페인 섭취 실태 조사

|    |  |     |                                                                                                    |    |                                                          |
|----|--|-----|----------------------------------------------------------------------------------------------------|----|----------------------------------------------------------|
| 학년 |  | 연령대 | <input type="checkbox"/> 20-23<br><input type="checkbox"/> 24-27<br><input type="checkbox"/> 28 이상 | 성별 | <input type="checkbox"/> 남<br><input type="checkbox"/> 여 |
|----|--|-----|----------------------------------------------------------------------------------------------------|----|----------------------------------------------------------|

안녕하세요. 의학과 4학년 의료인문 1조(김예원, 이창용, 장형수, 채희승, 최성우, 최영인)입니다. 저희는 의료인문 수업으로 "Good work project"의 일환으로 영남대학교 의과대학 학우들의 카페인 섭취 실태 조사를 진행하려고 합니다. 모든 조사는 익명이며, 여러분의 설문 조사 결과가 저희 활동에 큰 도움이 됩니다. 많은 참여 부탁드립니다!

1. 주로 섭취하는 카페인 식품은 무엇입니까?

- 커피(아메리카노, 라떼, 에스프레소 등)
- 커피(믹스커피, 캔 커피)
- 커피 첨가 식품(커피우유, 아이스크림)
- 차(밀크티, 홍차, 녹차, 아이스티등)
- 차 첨가 식품(녹차 아이스크림 등)
- 콜라
- 에너지 드링크
- 초콜릿
- 자양강장제 (박카스, 구론산 등)
- 기타

2. 카페인을 얼마나 자주/ 얼마나 많이 섭취합니까?

하루에 몇 번 먹는지 알려 주세요. 다른 종류로 섭취할 경우 복수로 응답해 주세요 (예시) 커피2 + 에너지 1

나는 일주일에 카페인을 (     ) 일 섭취한다

|                           |              |                      |              |
|---------------------------|--------------|----------------------|--------------|
| 커피<br>(아메리카노 등)           | 하루 (     ) 번 | 콜라                   | 하루 (     ) 번 |
| 커피<br>(믹스커피 등)            | 하루 (     ) 번 | 자양강장제<br>(100 mL 1병) | 하루 (     ) 번 |
| 커피 첨가 식품<br>(커피우유, 아이스크림) | 하루 (     ) 번 | 초콜릿<br>(35 g 1개)     | 하루 (     ) 번 |
| 차<br>(밀크티, 홍차, 녹차 등)      | 하루 (     ) 번 | 두통약<br>(500 mg 1알)   | 하루 (     ) 번 |
| 차 첨가 식품<br>(녹차 아이스크림 등)   | 하루 (     ) 번 | 기타                   | 하루 (     ) 번 |
| 에너지 드링크                   | 하루 (     ) 번 |                      |              |
| 초콜릿                       | 하루 (     ) 번 | -                    | -            |

3. 자신의 카페인 섭취에 대한 인식은 어떻습니까?

- 매우 많다고 생각한다
- 다소 많다고 생각한다
- 적당하다고 생각한다
- 다소 적은 편이라고 생각한다
- 매우 적다고 생각한다

4. 카페인을 섭취하는 이유는 무엇입니까?

- 학업  운동  대체제 없음  기호  기타 (\_\_\_\_\_)

5. 아래 증상들을 카페인 섭취 후에 느껴본 적이 있나요?

해당되는 상황이 있을 경우 모두 선택해 주세요.

- |                                      |                                   |                                 |
|--------------------------------------|-----------------------------------|---------------------------------|
| <input type="checkbox"/> 안절부절 못함     | <input type="checkbox"/> 얼굴 홍조    | <input type="checkbox"/> 근육 경련  |
| <input type="checkbox"/> 신경질적이거나 예민함 | <input type="checkbox"/> 잦은 소변    | <input type="checkbox"/> 주의산만   |
| <input type="checkbox"/> 흥분          | <input type="checkbox"/> 소화불량     | <input type="checkbox"/> 지칠줄 모름 |
| <input type="checkbox"/> 불면          | <input type="checkbox"/> 두서 없는 사고 | <input type="checkbox"/> 두근거림   |

6. 카페인을 처음 접한 시기는 언제입니까?

- 초등학교 이전  초등학교  중학생  고등학생  20세 이후
