# Supplementary material for: Caffeine consumption of medical students in Korea: amount and symptoms based on a 2023 survey
Source: PubMed Central journal article supplement — Korean J Med Educ. 2024 Aug 29;36(3):267–74. doi: 10.3946/kjme.2024.301 (PMC11456684; doi:10.3946/kjme.2024.301), 2024-08-29
Supplement: kjme-2024-301-Supplement-2.pdf [file kjme-2024-301-Supplement-2.pdf]

**Supplement 2.** Types and Content of Caffeine-Containing Beverages in Four Vending Machines on Campus

[표 1-1] 자판기 메뉴별 카페인 함량(경산)

| 메뉴                     | 갯수 | 카페인 함량(mg)                |
|------------------------|----|---------------------------|
| 펩시 제로 슈거(라임, 캔)        | 2  | 69                        |
| 칸타타 콘트라베이스 블랙          | 2  | 179                       |
| 밀키스                    | 2  |                           |
| 밀키스 제로                 | 1  |                           |
| 포카리 스위트(캔)             | 2  |                           |
| 포카리 스위트(500 mL)        | 2  |                           |
| 컨피던스(250 mL, 캔)        | 2  |                           |
| 마신다 미네랄 워터             | 2  |                           |
| 옥수수 수염차                | 1  |                           |
| 립톤 아이스티(복숭아, 500 mL)   | 2  | 카페인 고지량 없음(100 mL당 20 미만) |
| 까늬                     | 2  |                           |
| 오로나민 C                 | 2  | 14                        |
| 핫식스 더킹파워               | 2  | 100                       |
| 잔치집 식혜                 | 2  |                           |
| 레쓰비 카페타임 라떼(캔, 240 mL) | 2  | 78                        |
| 나랑드 사이다                | 2  |                           |

[표 1-2] 자판기 메뉴별 카페인 함량(경산)

| 메뉴                     | 갯수 | 카페인 함량(mg)                |
|------------------------|----|---------------------------|
| 펩시 제로 슈거(라임, 캔)        | 2  | 69                        |
| 칸타타 콘트라베이스 블랙          | 2  | 179                       |
| 데자와 로얄 밀크티(캔, 240 mL)  | 2  | 55                        |
| 밀키스 제로                 | 1  |                           |
| 포카리 스위트(캔)             | 2  |                           |
| 포카리 스위트(500 mL)        | 2  |                           |
| 컨피던스(250 mL, 캔)        | 2  |                           |
| 아이스                    | 2  |                           |
| 옥수수 수염차                | 1  |                           |
| 립톤 아이스티(복숭아, 500 mL)   | 2  | 카페인 고지량 없음(100 mL당 20 미만) |
| 까늬                     | 2  |                           |
| 오로나민 C                 | 2  | 14                        |
| 핫식스 더킹파워               | 2  | 100                       |
| 잔치집 식혜                 | 2  |                           |
| 레쓰비 카페타임 라떼(캔, 240 mL) | 2  | 78                        |
| 나랑드 사이다                | 2  |                           |

[표 1-3] 자판기 메뉴별 카페인 함량(의과대학)

| 메뉴                     | 갯수 | 카페인 함량(mg)                |
|------------------------|----|---------------------------|
| 펩시 제로 슈거(라임, 캔)        | 4  | 69                        |
| 칸타타 콘트라베이스 블랙1         | 1  | 179                       |
| 밀키스 제로                 | 2  |                           |
| 포카리 스위트(캔)             | 4  |                           |
| 포카리 스위트(500 mL)        | 3  |                           |
| 컨피던스(250 mL, 캔)        | 2  |                           |
| 아이스                    | 2  |                           |
| 립톤 아이스티(복숭아, 500 mL)   | 2  | 카페인 고지량 없음(100 mL당 20 미만) |
| 까늬                     | 1  |                           |
| 오로나민 C                 | 2  | 14                        |
| 핫식스 더킹파워               | 1  | 100                       |
| 잔치집 식혜                 | 2  |                           |
| 레쓰비 카페타임 라떼(캔, 240 mL) | 2  | 78                        |
| 나랑드 사이다                | 2  |                           |

[표 1-4] 자판기 메뉴별 카페인 함량(의과대학, 커피자판기)

| 메뉴         | 갯수 | 카페인 함량(mg) |
|------------|----|------------|
| 아메리카노      | 2  |            |
| 디카페인 아메리카노 | 1  |            |
| 아이스 아메리카노  | 2  |            |
| 아이스 디카페인   | 1  |            |

해당 자판기에서 카페인 함량이 나타나 있지 않음.
